# Supplementary material
Source: HighWire-hosted journal article supplement (https://www.cmaj.ca/highwire/filestream/59227/field_highwire_adjunct_files/0/186_12.pdf)
Supplement: 186_12.pdf [file 186_12.pdf]

## ÉDITORIAL

## Une bouche saine pour une bonne santé : améliorer la santé buccodentaire des aînés canadiens

Diane Kelsall MD MEd, John O'Keefe BDentSc MDentSc MBA

Pour la version anglaise de l'éditorial, veuillez consulter la page 893.

Imaginez le scénario suivant : une femme de 74 ans présente une plaie infectée de la grandeur de la paume. Son médecin l'informe que le traitement de ce type d'infection chez les aînés n'est pas couvert par le régime d'assurance-maladie de sa province et qu'en conséquence, elle devra le payer de sa poche. Son budget étant serré, la patiente quitte le bureau sans subir de traitement.

Invraisemblable, diriez-vous? C'est pourtant vrai. La patiente ne souffre pas d'une infection cutanée mais d'une parodontite. La zone touchée est très étendue. La parodontite est associée à certaines maladies systémiques, comme la coronaropathie, l'accident vasculaire cérébral et la pneumonie d'aspiration<sup>1-3</sup>. Toutefois, au Canada, la plupart des aînés n'ont aucune assurance-soins dentaires; seules certaines interventions chirurgicales buccodentaires pratiquées à l'hôpital sont couvertes par les régimes d'assurance-maladie<sup>4</sup>. Cette lacune a de graves répercussions sur la santé des aînés canadiens en ce sens qu'elle augmente le risque de maladies buccodentaires et de maladies systémiques chez ces personnes vulnérables.

### Près d'un aîné sur six refuse les soins dentaires recommandés en raison des coûts.

On dispose de plus en plus de preuves de l'existence d'un lien entre la maladie buccodentaire et la maladie systémique, mais ce lien n'est pas tout à fait élucidé<sup>1,3</sup>. Bien que la maladie parodontale ait été associée, notamment, au diabète, à l'arthrite rhumatoïde et à l'obésité, les données probantes sont les plus solides dans le cas du lien avec la maladie cardiovasculaire<sup>1,3</sup>. Le rôle de l'inflammation chronique dans l'athérogenèse est bien connu et il pourrait expliquer l'existence de ce lien. Les effets directs de l'infection pourraient jouer aussi un certain rôle<sup>3</sup>.

Bon nombre d'aînés ont une mauvaise santé buccodentaire, l'âge avancé étant le facteur de maladie parodontale le plus déterminant. Selon les résultats de l'Enquête canadienne sur les mesures de santé, un aîné sur six parmi les 60 à 79 ans avait des caries dentaires non traitées<sup>5</sup>. Plus de la moitié des répondants présentaient une maladie parodontale, qui était

grave chez 15 % d'entre eux. Un répondant sur cinq avait perdu toutes ses dents.

Bien que la plupart des aînés affirment se brosser les dents et utiliser la soie dentaire aussi souvent que les jeunes<sup>5</sup>, plusieurs facteurs contribuent à accroître le risque de mauvaise santé buccodentaire dans ce groupe d'âge. Avec le temps, l'hypo-fonctionnement des glandes salivaires associé à la prise de certains médicaments et à certaines maladies chroniques cause une diminution de production de salive et une hausse de la charge virale dans la bouche<sup>2</sup>. Les gencives se décollent. Certaines personnes âgées ont des difficultés mécaniques à se brosser les dents ou à utiliser la soie dentaire. La maladie chronique et la mauvaise alimentation contribuent à affaiblir l'immunité contre l'infection, ce qui favorise la maladie parodontale<sup>2</sup>. S'installe alors un cercle vicieux : mauvaise dentition, malnutrition, comorbidités accrues<sup>2</sup>. Même chez les personnes âgées qui ont perdu toutes leurs dents, on peut voir une stomatite prothétique ou l'évitement de certains aliments, ce qui ajoutera aux troubles systémiques<sup>2</sup>.

Au Canada, seuls les gouvernements de l'Alberta et du Yukon offrent une aide financière aux personnes de plus de 65 ans nécessitant des soins dentaires<sup>4</sup>. Au moment de la retraite, la plupart des Canadiens n'ont plus droit à des prestations d'assurance-soins dentaires; ils doivent donc assumer le coût des services dentaires ou souscrire un régime privé d'assurance-soins dentaires. L'Enquête canadienne sur les mesures de santé a révélé que plus de la moitié des aînés de la collectivité n'avaient aucune protection en matière de soins dentaires et que 39 % environ étaient protégés par un régime d'assurance privé<sup>5</sup>. Plus d'une personne âgée sur 10 a affirmé éviter les visites chez le dentiste, alors que 16 % environ ont indiqué avoir refusé les traitements dentaires recommandés en raison des dépenses qu'ils représentaient. La maladie parodontale grave était la plus fréquente chez les personnes n'ayant aucune assurance-soins médicaux. De fait, l'absence d'assurance des soins de santé était l'unique facteur qui semblait influencer sur la prévalence de la maladie grave.

Les répercussions d'une mauvaise santé buccodentaire vont bien au-delà de la bouche. Compte tenu du vieillissement de la population canadienne, le fardeau que représente une maladie associée à une affection buccodentaire et aux maladies apparentées risque de faire augmenter les dépenses de santé de même que les dépenses d'aide socio-économique<sup>4</sup>. L'absence de protection en matière de soins dentaires est un

obstacle au maintien d'une bonne santé buccodentaire chez les aînés canadiens<sup>5</sup>. Afin de trouver le meilleur moyen de garantir l'accès à des soins dentaires pour ce groupe vulnérable, il faudra une consultation entre les divers intervenants, ce qui a été amorcé par l'Association dentaire canadienne. Espérons que ce dialogue permettra de créer une feuille de route permettant d'obtenir des résultats concrets positifs en matière de santé buccodentaire chez les aînés.

## Références

1. Galgut PN. Periodontal disease and poor health outcomes. *BMJ* 2010;340:c2735.
2. Yao CS, MacEntee MI. Inequity in oral health care for elderly Canadians: Part 1. Oral health status. *J Can Dent Assoc* 2014;79:d114.

3. Ford PJ, Raphael SL, Cullinan MP, et al. Why should a doctor be interested in oral disease? *Expert Rev Cardiovasc Ther* 2010;8:1483-93.
4. Yao CS, MacEntee MI. Inequity in oral health care for elderly Canadians: Part 2. Causes and ethical considerations. *J Can Dent Assoc* 2014;80:e10.
5. *Rapport des résultats du module sur la santé buccodentaire de l'Enquête canadienne sur les mesures de la santé 2007-2009*. Ottawa : Santé Canada; 2010. Disponible ici : [www.fptdwc.ca/assets/PDF/CHMS/CHMS-F-tech.pdf](http://www.fptdwc.ca/assets/PDF/CHMS/CHMS-F-tech.pdf) (consulté le 23 juillet 2014).

**Intérêts concurrents :** Pour Diane Kelsall, consulter [www.cmaj.ca/site/misc/cmaj\\_staff.xhtml](http://www.cmaj.ca/site/misc/cmaj_staff.xhtml). Aucun déclaré pour John O'Keefe.

**Affiliations :** Diane Kelsall est rédactrice en chef adjointe du JAMC; John O'Keefe est le directeur, Réseaux du savoir, Association dentaire canadienne, et rédacteur en chef du *Journal of the Canadian Dental Association*, Ottawa (Ont.).

**Correspondance à :** Éditeur du JAMC, [pubs@cmaj.ca](mailto:pubs@cmaj.ca)

## RÉSUMÉS DE RECHERCHE

# Prédicteurs de l'accident vasculaire cérébral précoce et tardif après la chirurgie cardiaque

Richard Whitlock MD, Jeff S. Healey MD, Stuart J. Connolly MD, Julie Wang MSc, Matthew R. Danter MD, Jack V. Tu MD PhD, Richard Novick MD, Stephen Fremes MD, Kevin Teoh MD, Vikas Khera MD, Salim Yusuf MD

Pour la version anglaise de ce résumé, veuillez consulter la page 905.

### Intérêts concurrents :

Aucun déclaré.

### Avertissement :

Les données utilisées dans cette publication proviennent du Cardiac Care Network de l'Ontario et de ses hôpitaux membres. Le Cardiac Care Network of Ontario et l'Institute for Clinical Evaluative Sciences (ICES) sont subventionnés par le Ministère de la santé et des soins de longue durée de l'Ontario. Les résultats et les conclusions n'engagent que les auteurs et ne peuvent être attribués à l'ICES ni au Ministère de la santé.

Cet article a été revu par les pairs.

### Correspondance à :

Richard Whitlock, [richard.whitlock@phri.ca](mailto:richard.whitlock@phri.ca)

**Contexte :** Les risques d'accident vasculaire cérébral (AVC) à brève échéance après la chirurgie cardiaque sont bien connus. Nous avons analysé les taux et les prédicteurs de l'AVC à long terme dans une cohorte de patients soumis à une chirurgie cardiaque.

**Méthodes :** Nous avons obtenu des données corrélées concernant les patients soumis à une chirurgie cardiaque dans la province de l'Ontario entre 1996 et 2006. Nous avons analysé l'incidence de l'AVC et du décès jusqu'à 2 ans après la chirurgie.

**Résultats :** Sur 108 711 patients, 1,8 % (intervalle de confiance [IC] de 95 % 1,7-1,9 %) ont subi un AVC en période périopératoire et 3,6 % (IC de 95 % 3,5-3,7 %), dans les deux années suivantes. Les prédicteurs les plus fiables de l'AVC précoce et tardif étaient l'âge avancé ( $\geq 65$  ans; risque relatif [RR] ajusté pour tous les AVC 1,9, IC de 95 % 1,8-2,0), des antécédents d'AVC ou d'accès ischémique transitoire cérébral (RR ajusté 2,1, IC de 95 % 1,9-2,3), la maladie vasculaire périphérique (RR ajusté 1,6, IC de 95 % 1,5-1,7), la chirurgie pour pontage aortocoronarien combi-

née à un remplacement valvulaire (RR ajusté 1,7, IC de 95 % 1,5-1,8) et la chirurgie valvulaire seule (RR ajusté 1,4, IC de 95 % 1,2-1,5). Le recours préopératoire à la dialyse (rapport des cotes [RC] relatif ajusté 2,1, IC de 95 % 1,6-2,8) et la fibrillation auriculaire (FA) postopératoire *de novo* (RC ajusté 1,5, IC de 95 % 1,3-1,6) étaient des prédicteurs de l'AVC précoce seulement. Un score CHADS<sub>2</sub> de 2 ou plus a été associé à un risque accru d'AVC ou de décès comparativement à un score de 0 ou 1 (19,9 % c. 9,3 % chez les patients qui avaient des antécédents de FA, 16,8 % c. 7,8 % chez ceux qui présentaient une FA postopératoire *de novo* et 14,8 % c. 5,8 % chez les patients indemnes de FA).

**Interprétation :** Les patients soumis à une chirurgie cardiaque étaient exposés à un risque plus élevé d'AVC durant la période postopératoire immédiate et ont continué de présenter un risque au cours des 2 années suivantes, les facteurs de risque étant similaires pour ces périodes. La FA auriculaire postopératoire *de novo* était un prédicteur de l'AVC précoce seulement. Le score CHADS<sub>2</sub> a permis de prédire le risque d'AVC chez les patients présentant ou non une FA.
